# Supplementary material for: Plasma Biomarker Profiling in Heart Failure Patients with Preserved Ejection Fraction before and after Spironolactone Treatment: Results from the Aldo-DHF Trial
Source: MDPI journal article supplement (doi:10.3390/cells10102796), 2021-10-19
Supplement: s1 [file s1]

## **SUPPLEMENTARY MATERIALS**

**Plasma biomarker profiling in heart failure patients with preserved ejection fraction before and after  
spironolactone treatment: results from the Aldo-DHF trial**

*by Schnelle et al.*

## TABLE OF CONTENTS

Suppl. Table S1: Baseline characteristics.

Suppl. Table S2: Full list of plasma biomarker expression levels.

Suppl. Table S3a: Significant associations between the left ventricular mass index (LVMI) and plasma biomarker levels in HFpEF patients at baseline.

Suppl. Table S3b: Significant associations between plasma NT-proBNP concentrations and plasma biomarker levels in HFpEF patients at baseline.

Suppl. Table S3c: Significant associations between SF-36 physical functioning scale score and plasma biomarker levels in HFpEF patients at baseline.

Suppl. Figure S1: Plasma biomarkers with predictive value in regard to spironolactone-mediated effects on relative E/e' changes in HFpEF patients.

Suppl. Figure S2: Plasma biomarkers with predictive value in regard to spironolactone-mediated effects on relative peak VO<sub>2</sub> changes in HFpEF patients.

Suppl. Table S1: Baseline characteristics.

|                                             | Total (n = 386)         | Placebo (n = 187)       | Verum (n = 199)         |
|---------------------------------------------|-------------------------|-------------------------|-------------------------|
| <b>Demographics</b>                         |                         |                         |                         |
| Male gender, n (%)                          | 183 (47.4%)             | 92 (49.2%)              | 91 (45.7%)              |
| Age, years                                  | 67.3 ± 7.6              | 67.3 ± 7.6              | 67.4 ± 7.6              |
| <b>Medical history, n (%)</b>               |                         |                         |                         |
| Coronary artery disease                     | 151 (39.1%)             | 68 (36.4%)              | 83 (41.7%)              |
| Hypertension                                | 353 (91.5%)             | 170 (90.9%)             | 183 (92.0%)             |
| Hyperlipidaemia                             | 229 (59.3%)             | 120 (64.2%)             | 109 (54.8%)             |
| Diabetes mellitus                           | 66 (17.1%)              | 32 (17.1%)              | 34 (17.1%)              |
| <b>Physical examination (n)</b>             |                         |                         |                         |
| SBP, mmHg                                   | 135.6 ± 17.8 (385)      | 135.9 ± 18.1 (187)      | 135.3 ± 17.6 (198)      |
| DBP, mmHg                                   | 79.3 ± 10.9 (385)       | 79.5 ± 11.7 (187)       | 79.1 ± 10.1 (198)       |
| HR, b.p.m.                                  | 66.6 ± 11.1 (385)       | 65.8 ± 10.9 (187)       | 67.4 ± 11.2 (198)       |
| <b>Laboratory measures (n)</b>              |                         |                         |                         |
| Haemoglobin, g/dL                           | 13.8 ± 1.2 (384)        | 13.8 ± 1.2 (187)        | 13.8 ± 1.2 (197)        |
| Creatinine, mg/dL                           | 0.9 ± 0.2 (385)         | 0.9 ± 0.2 (187)         | 0.9 ± 0.2 (198)         |
| NT-proBNP, ng/L; median, IQR                | 159.2, 84.3-305.7 (375) | 147.8, 83.7-276.0 (183) | 180.7, 85.0-313.3 (192) |
| <b>Echocardiography (n)</b>                 |                         |                         |                         |
| LVEF, %                                     | 67.5 ± 7.8 (386)        | 67.9 ± 7.5 (187)        | 67.2 ± 8.0 (199)        |
| LVMI, g/m <sup>2</sup>                      | 106.8 ± 28.1 (386)      | 107.8 ± 26.9 (187)      | 105.9 ± 29.3 (199)      |
| E/e', ratio                                 | 12.8 ± 3.9 (385)        | 12.8 ± 4.2 (186)        | 12.8 ± 3.6 (199)        |
| <b>Cardiopulmonary exercise testing (n)</b> |                         |                         |                         |
| Peak VO <sub>2</sub> , mL/min/kg            | 16.3 ± 3.5 (386)        | 16.3 ± 3.4 (187)        | 16.3 ± 3.6 (199)        |

Values are expressed as mean ± standard deviation or median and interquartile range (IQR), and categorical variables as number (%).

DBP: diastolic blood pressure; E/e': ratio of peak early transmitral ventricular filling velocity to early diastolic tissue Doppler velocity; HR: heart rate; LVEF: left ventricular ejection fraction; LVMI: left ventricular mass index; SBP: systolic blood pressure.

**Suppl. Table S2: Full list of plasma biomarker expression levels.** Shown are NPX values at baseline (BL) and following twelve months (follow up, FU) of spironolactone (verum) or placebo treatment.

| Biomarker                                  | Total              | BL                 | FU                | Placebo BL         | Placebo FU        | Verum BL          | Verum FU          |
|--------------------------------------------|--------------------|--------------------|-------------------|--------------------|-------------------|-------------------|-------------------|
| n                                          | 772                | 386                | 386               | 187                | 187               | 199               | 199               |
| <b>BONE MORPHOGENETIC PROTEIN 6 (BMP6)</b> |                    |                    |                   |                    |                   |                   |                   |
| mean ± sd                                  | 3.66 ± 0.70        | 3.67 ± 0.70        | 3.66 ± 0.70       | 3.67 ± 0.70        | 3.70 ± 0.60       | 3.66 ± 0.80       | 3.62 ± 0.80       |
| median (min; max)                          | 3.76 (1.08; 7.04)  | 3.79 (1.08; 6.88)  | 3.74 (1.15; 7.04) | 3.78 (1.08; 6.88)  | 3.76 (1.41; 7.04) | 3.79 (1.13; 5.30) | 3.73 (1.15; 5.72) |
| <b>ANGIOPOIETIN-1 (ANGPT1)</b>             |                    |                    |                   |                    |                   |                   |                   |
| mean ± sd                                  | 7.19 ± 0.80        | 7.16 ± 0.80        | 7.22 ± 0.80       | 7.13 ± 0.80        | 7.20 ± 0.80       | 7.18 ± 0.80       | 7.25 ± 0.80       |
| median (min; max)                          | 7.07 (5.44; 10.25) | 7.03 (5.44; 10.25) | 7.09 (5.52; 9.97) | 7.01 (5.63; 10.25) | 7.02 (5.64; 9.97) | 7.08 (5.44; 9.84) | 7.21 (5.52; 9.43) |
| <b>ADRENOMEDULLIN (ADM)</b>                |                    |                    |                   |                    |                   |                   |                   |
| mean ± sd                                  | 7.83 ± 0.60        | 7.81 ± 0.60        | 7.85 ± 0.60       | 7.83 ± 0.60        | 7.79 ± 0.70       | 7.79 ± 0.60       | 7.90 ± 0.60       |
| median (min; max)                          | 7.91 (3.16; 9.26)  | 7.92 (3.50; 9.01)  | 7.91 (3.16; 9.26) | 7.94 (4.15; 9.01)  | 7.87 (3.16; 9.23) | 7.89 (3.50; 8.99) | 7.94 (4.89; 9.26) |
| <b>CD40 LIGAND (CD40L)</b>                 |                    |                    |                   |                    |                   |                   |                   |
| mean ± sd                                  | 4.29 ± 0.80        | 4.31 ± 0.80        | 4.28 ± 0.90       | 4.31 ± 0.80        | 4.27 ± 0.90       | 4.30 ± 0.80       | 4.30 ± 0.90       |
| median (min; max)                          | 4.16 (2.17; 8.15)  | 4.16 (2.67; 8.15)  | 4.15 (2.17; 7.61) | 4.16 (2.67; 8.15)  | 4.13 (2.17; 7.61) | 4.16 (2.84; 7.03) | 4.19 (2.46; 6.85) |
| <b>SLAM FAMILY MEMBER 7 (SLAMF7)</b>       |                    |                    |                   |                    |                   |                   |                   |

|                                                                                             |                    |                    |                    |                    |                    |                    |                    |
|---------------------------------------------------------------------------------------------|--------------------|--------------------|--------------------|--------------------|--------------------|--------------------|--------------------|
| mean ± sd                                                                                   | 4.42 ± 0.70        | 4.41 ± 0.70        | 4.44 ± 0.70        | 4.40 ± 0.70        | 4.44 ± 0.70        | 4.42 ± 0.60        | 4.44 ± 0.70        |
| median (min; max)                                                                           | 4.35 (2.77; 7.04)  | 4.35 (2.77; 6.90)  | 4.37 (2.86; 7.04)  | 4.32 (2.88; 6.90)  | 4.38 (3.01; 7.02)  | 4.38 (2.77; 6.61)  | 4.36 (2.86; 7.04)  |
| <b>PLACENTA GROWTH FACTOR (PGF)</b>                                                         |                    |                    |                    |                    |                    |                    |                    |
| mean ± sd                                                                                   | 9.12 ± 0.40        | 9.09 ± 0.40        | 9.16 ± 0.40        | 9.08 ± 0.40        | 9.14 ± 0.40        | 9.10 ± 0.40        | 9.18 ± 0.40        |
| median (min; max)                                                                           | 9.11 (7.95; 10.42) | 9.09 (8.11; 10.35) | 9.13 (7.95; 10.42) | 9.09 (8.18; 10.30) | 9.12 (7.95; 10.32) | 9.10 (8.11; 10.35) | 9.18 (8.40; 10.42) |
| <b>A DISINTEGRIN AND METALLOPROTEINASE WITH THROMBOSPONDIN TYPE 1 REPEATS 13 (ADAMTS13)</b> |                    |                    |                    |                    |                    |                    |                    |
| mean ± sd                                                                                   | 7.78 ± 0.10        | 7.78 ± 0.10        | 7.79 ± 0.10        | 7.78 ± 0.10        | 7.80 ± 0.10        | 7.78 ± 0.10        | 7.78 ± 0.20        |
| median (min; max)                                                                           | 7.78 (7.15; 8.29)  | 7.78 (7.29; 8.16)  | 7.79 (7.15; 8.29)  | 7.78 (7.29; 8.13)  | 7.79 (7.40; 8.29)  | 7.77 (7.30; 8.16)  | 7.79 (7.15; 8.25)  |
| <b>BROTHER OF CD0 (BOC)</b>                                                                 |                    |                    |                    |                    |                    |                    |                    |
| mean ± sd                                                                                   | 4.98 ± 0.00        | 4.98 ± 0.00        | 4.99 ± 0.00        | 4.99 ± 0.00        | 5.00 ± 0.00        | 4.98 ± 0.00        | 4.97 ± 0.00        |
| median (min; max)                                                                           | 4.99 (4.06; 5.79)  | 4.99 (4.06; 5.60)  | 4.99 (4.18; 5.79)  | 4.99 (4.29; 5.56)  | 4.99 (4.18; 5.77)  | 4.99 (4.06; 5.60)  | 4.99 (4.28; 5.79)  |
| <b>INTERLEUKIN-4 RECEPTOR SUBUNIT ALPHA (IL4RA)</b>                                         |                    |                    |                    |                    |                    |                    |                    |
| mean ± sd                                                                                   | 2.54 ± 0.40        | 2.54 ± 0.40        | 2.54 ± 0.40        | 2.56 ± 0.40        | 2.52 ± 0.40        | 2.52 ± 0.40        | 2.55 ± 0.40        |
| median (min; max)                                                                           | 2.51 (1.56; 5.30)  | 2.51 (1.65; 5.29)  | 2.51 (1.56; 5.30)  | 2.52 (1.75; 5.29)  | 2.51 (1.62; 5.30)  | 2.50 (1.65; 3.67)  | 2.51 (1.56; 3.70)  |
| <b>PROTO-ONCOGENE TYROSINE-PROTEIN KINASE SRC (SRC)</b>                                     |                    |                    |                    |                    |                    |                    |                    |

|                                                                              |                      |                      |                      |                      |                      |                      |                      |
|------------------------------------------------------------------------------|----------------------|----------------------|----------------------|----------------------|----------------------|----------------------|----------------------|
| mean ± sd                                                                    | 6.32 ± 1.00          | 6.26 ± 0.90          | 6.38 ± 1.00          | 6.25 ± 0.90          | 6.30 ± 1.00          | 6.27 ± 0.90          | 6.45 ± 1.00          |
| median<br>(min; max)                                                         | 6.25 (2.92;<br>9.02) | 6.23 (4.06;<br>9.02) | 6.34 (2.92;<br>8.39) | 6.23 (4.06;<br>8.39) | 6.24 (2.92;<br>8.39) | 6.21 (4.11;<br>9.02) | 6.44 (3.34;<br>8.37) |
| <b>INTERLEUKIN-1 RECEPTOR ANTAGONIST (IL1ra)</b>                             |                      |                      |                      |                      |                      |                      |                      |
| mean ± sd                                                                    | 5.97 ± 1.00          | 5.97 ± 1.00          | 5.97 ± 1.00          | 5.92 ± 0.70          | 5.90 ± 0.60          | 6.01 ± 1.00          | 6.04 ± 1.00          |
| median<br>(min; max)                                                         | 5.89 (4.47;<br>8.36) | 5.88 (4.47;<br>8.19) | 5.90 (4.57;<br>8.36) | 5.81 (4.47;<br>8.13) | 5.89 (4.57;<br>7.89) | 5.94 (4.56;<br>8.19) | 5.90 (4.60;<br>8.36) |
| <b>INTERLEUKIN-6 (IL6)</b>                                                   |                      |                      |                      |                      |                      |                      |                      |
| mean ± sd                                                                    | 4.49 ± 0.90          | 4.46 ± 0.80          | 4.51 ± 0.90          | 4.45 ± 0.80          | 4.46 ± 0.90          | 4.47 ± 0.90          | 4.56 ± 0.90          |
| median<br>(min; max)                                                         | 4.35 (2.82;<br>9.71) | 4.34 (2.82;<br>8.59) | 4.36 (2.96;<br>9.71) | 4.34 (2.82;<br>7.55) | 4.32 (2.96;<br>9.71) | 4.38 (2.85;<br>8.59) | 4.40 (3.15;<br>8.68) |
| <b>TUMOR NECROSIS FACTOR RECEPTOR SUPERFAMILY MEMBER 10A<br/>(TNFRSF10A)</b> |                      |                      |                      |                      |                      |                      |                      |
| mean ± sd                                                                    | 3.90 ± 0.50          | 3.86 ± 0.50          | 3.94 ± 0.50          | 3.82 ± 0.40          | 3.87 ± 0.40          | 3.90 ± 0.50          | 4.00 ± 1.00          |
| median<br>(min; max)                                                         | 3.87 (2.86;<br>8.77) | 3.84 (2.99;<br>8.77) | 3.93 (2.86;<br>8.61) | 3.80 (3.00;<br>4.82) | 3.88 (2.86;<br>5.37) | 3.84 (2.99;<br>8.77) | 3.97 (3.03;<br>8.61) |
| <b>SERIN/THREONINE PROTEIN KINASE 4 (STK4)</b>                               |                      |                      |                      |                      |                      |                      |                      |
| mean ± sd                                                                    | 3.22 ± 0.90          | 3.21 ± 0.90          | 3.23 ± 0.80          | 3.19 ± 0.80          | 3.23 ± 0.90          | 3.22 ± 0.90          | 3.23 ± 0.80          |
| median<br>(min; max)                                                         | 3.02 (2.12;<br>7.53) | 3.02 (2.12;<br>7.53) | 3.02 (2.13;<br>6.35) | 3.01 (2.12;<br>6.51) | 3.03 (2.13;<br>6.35) | 3.05 (2.12;<br>7.53) | 3.02 (2.14;<br>5.65) |
| <b>ALPHA-L-IDURONIDASE (IDUA)</b>                                            |                      |                      |                      |                      |                      |                      |                      |

|                                                                              |                       |                       |                       |                       |                       |                       |                       |
|------------------------------------------------------------------------------|-----------------------|-----------------------|-----------------------|-----------------------|-----------------------|-----------------------|-----------------------|
| mean ± sd                                                                    | 6.28 ± 0.50           | 6.26 ± 0.60           | 6.29 ± 0.50           | 6.27 ± 0.60           | 6.28 ± 0.50           | 6.26 ± 0.60           | 6.30 ± 0.50           |
| median<br>(min; max)                                                         | 6.31 (3.30;<br>7.57)  | 6.30 (3.30;<br>7.47)  | 6.32 (4.11;<br>7.57)  | 6.28 (3.92;<br>7.47)  | 6.31 (4.11;<br>7.57)  | 6.34 (3.30;<br>7.36)  | 6.32 (4.58;<br>7.52)  |
| <b>TUMOR NECROSIS FACTOR RECEPTOR SUPERFAMILY MEMBER 11A<br/>(TNFRSF11A)</b> |                       |                       |                       |                       |                       |                       |                       |
| mean ± sd                                                                    | 6.35 ± 0.50           | 6.29 ± 0.50           | 6.41 ± 0.50           | 6.29 ± 0.50           | 6.36 ± 0.50           | 6.29 ± 0.50           | 6.45 ± 0.50           |
| median<br>(min; max)                                                         | 6.31 (5.12;<br>8.24)  | 6.28 (5.14;<br>8.23)  | 6.39 (5.12;<br>8.24)  | 6.28 (5.14;<br>8.05)  | 6.31 (5.24;<br>8.24)  | 6.28 (5.31;<br>8.23)  | 6.43 (5.12;<br>7.82)  |
| <b>PROTEINASE-ACTIVATED RECEPTOR 1 (PAR1)</b>                                |                       |                       |                       |                       |                       |                       |                       |
| mean ± sd                                                                    | 8.55 ± 0.40           | 8.51 ± 0.40           | 8.60 ± 0.40           | 8.50 ± 0.40           | 8.56 ± 0.40           | 8.52 ± 0.40           | 8.64 ± 0.40           |
| median<br>(min; max)                                                         | 8.57 (6.08;<br>10.02) | 8.53 (6.15;<br>9.84)  | 8.60 (6.08;<br>10.02) | 8.53 (7.33;<br>9.34)  | 8.57 (6.83;<br>9.69)  | 8.53 (6.15;<br>9.84)  | 8.65 (6.08;<br>10.02) |
| <b>TNF-RELATED APOPTOSIS-INDUCING LIGAND RECEPTOR 2 (TRAILR2)</b>            |                       |                       |                       |                       |                       |                       |                       |
| mean ± sd                                                                    | 6.55 ± 0.40           | 6.50 ± 0.40           | 6.59 ± 0.40           | 6.50 ± 0.40           | 6.56 ± 0.40           | 6.51 ± 0.40           | 6.63 ± 0.40           |
| median<br>(min; max)                                                         | 6.51 (5.41;<br>8.27)  | 6.47 (5.46;<br>8.15)  | 6.56 (5.41;<br>8.27)  | 6.46 (5.62;<br>7.91)  | 6.50 (5.60;<br>8.11)  | 6.47 (5.46;<br>8.15)  | 6.59 (5.41;<br>8.27)  |
| <b>SERIN PROTEASE 27 (PRSS27)</b>                                            |                       |                       |                       |                       |                       |                       |                       |
| mean ± sd                                                                    | 9.64 ± 0.50           | 9.61 ± 0.50           | 9.67 ± 0.50           | 9.58 ± 0.40           | 9.63 ± 0.50           | 9.63 ± 0.50           | 9.70 ± 0.50           |
| median<br>(min; max)                                                         | 9.60 (8.22;<br>11.87) | 9.57 (8.51;<br>11.52) | 9.64 (8.22;<br>11.87) | 9.56 (8.53;<br>10.71) | 9.63 (8.22;<br>10.78) | 9.57 (8.51;<br>11.52) | 9.64 (8.75;<br>11.87) |
| <b>ANGIOPOIETIN-1 RECEPTOR (TIE2)</b>                                        |                       |                       |                       |                       |                       |                       |                       |

|                                                                  |                    |                    |                    |                    |                    |                    |                    |
|------------------------------------------------------------------|--------------------|--------------------|--------------------|--------------------|--------------------|--------------------|--------------------|
| mean ± sd                                                        | 8.14 ± 0.30        | 8.13 ± 0.30        | 8.14 ± 0.30        | 8.12 ± 0.30        | 8.14 ± 0.20        | 8.13 ± 0.30        | 8.14 ± 0.30        |
| median (min; max)                                                | 8.12 (7.31; 9.20)  | 8.12 (7.31; 9.20)  | 8.13 (7.48; 8.90)  | 8.12 (7.31; 8.76)  | 8.15 (7.54; 8.90)  | 8.10 (7.33; 9.20)  | 8.12 (7.48; 8.84)  |
| <b>TISSUE FACTOR (TF)</b>                                        |                    |                    |                    |                    |                    |                    |                    |
| mean ± sd                                                        | 6.37 ± 0.30        | 6.34 ± 0.30        | 6.39 ± 0.30        | 6.35 ± 0.30        | 6.40 ± 0.30        | 6.34 ± 0.30        | 6.37 ± 0.30        |
| median (min; max)                                                | 6.36 (5.42; 7.59)  | 6.35 (5.42; 7.28)  | 6.37 (5.55; 7.59)  | 6.36 (5.51; 7.17)  | 6.39 (5.55; 7.59)  | 6.35 (5.42; 7.28)  | 6.36 (5.57; 7.19)  |
| <b>INTERLEUKIN-1 RECEPTOR-LIKE 2 (IL1RL2)</b>                    |                    |                    |                    |                    |                    |                    |                    |
| mean ± sd                                                        | 5.57 ± 0.40        | 5.58 ± 0.40        | 5.56 ± 0.40        | 5.58 ± 0.40        | 5.57 ± 0.40        | 5.57 ± 0.50        | 5.55 ± 0.50        |
| median (min; max)                                                | 5.58 (4.15; 6.94)  | 5.60 (4.17; 6.86)  | 5.57 (4.15; 6.94)  | 5.60 (4.39; 6.86)  | 5.56 (4.51; 6.71)  | 5.60 (4.17; 6.82)  | 5.61 (4.15; 6.94)  |
| <b>PLATELED-DERIVED GROWTH FACTOR SUBUNIT B (PDGF subunit B)</b> |                    |                    |                    |                    |                    |                    |                    |
| mean ± sd                                                        | 8.77 ± 1.00        | 8.75 ± 1.00        | 8.79 ± 1.00        | 8.72 ± 1.00        | 8.75 ± 1.00        | 8.77 ± 1.00        | 8.82 ± 1.00        |
| median (min; max)                                                | 8.69 (6.12; 11.70) | 8.71 (6.21; 11.70) | 8.68 (6.12; 11.62) | 8.67 (6.24; 11.59) | 8.59 (6.12; 11.62) | 8.73 (6.21; 11.70) | 8.79 (6.40; 11.05) |
| <b>INTERLEUKIN-27 (IL27)</b>                                     |                    |                    |                    |                    |                    |                    |                    |
| mean ± sd                                                        | 6.45 ± 0.30        | 6.43 ± 0.30        | 6.47 ± 0.30        | 6.41 ± 0.30        | 6.45 ± 0.30        | 6.45 ± 0.40        | 6.50 ± 0.40        |
| median (min; max)                                                | 6.46 (5.38; 7.66)  | 6.45 (5.38; 7.66)  | 6.46 (5.56; 7.59)  | 6.44 (5.38; 7.43)  | 6.45 (5.56; 7.25)  | 6.47 (5.42; 7.66)  | 6.48 (5.65; 7.59)  |
| <b>INTERLEUKIN-17D (IL17D)</b>                                   |                    |                    |                    |                    |                    |                    |                    |



|                                                 |                       |                       |                       |                       |                       |                       |                       |
|-------------------------------------------------|-----------------------|-----------------------|-----------------------|-----------------------|-----------------------|-----------------------|-----------------------|
| mean ± sd                                       | 3.36 ± 0.50           | 3.36 ± 0.50           | 3.36 ± 0.50           | 3.36 ± 0.40           | 3.36 ± 0.40           | 3.36 ± 0.50           | 3.36 ± 0.60           |
| median<br>(min; max)                            | 3.33 (1.89;<br>9.88)  | 3.34 (1.89;<br>9.13)  | 3.32 (2.27;<br>9.88)  | 3.37 (1.89;<br>5.58)  | 3.33 (2.27;<br>5.05)  | 3.32 (2.44;<br>9.13)  | 3.31 (2.57;<br>9.88)  |
| <b>C-X-C MOTIF CHEMOKINE LIGAND 1 (CXCL1)</b>   |                       |                       |                       |                       |                       |                       |                       |
| mean ± sd                                       | 8.78 ± 0.80           | 8.76 ± 0.70           | 8.81 ± 0.80           | 8.75 ± 0.70           | 8.79 ± 0.80           | 8.77 ± 0.80           | 8.83 ± 0.80           |
| median<br>(min; max)                            | 8.73 (6.89;<br>11.46) | 8.72 (6.93;<br>11.46) | 8.74 (6.89;<br>11.44) | 8.75 (7.17;<br>11.46) | 8.71 (7.04;<br>11.07) | 8.68 (6.93;<br>11.26) | 8.82 (6.89;<br>11.44) |
| <b>LECTIN-LIKE OXIDIZED LDL RECEPTOR (LOX1)</b> |                       |                       |                       |                       |                       |                       |                       |
| mean ± sd                                       | 7.15 ± 0.80           | 7.14 ± 0.80           | 7.17 ± 0.80           | 7.11 ± 0.80           | 7.12 ± 0.90           | 7.16 ± 0.80           | 7.21 ± 0.80           |
| median<br>(min; max)                            | 6.95 (5.62;<br>9.59)  | 6.95 (5.69;<br>9.59)  | 6.96 (5.62;<br>9.54)  | 6.95 (5.69;<br>9.59)  | 6.89 (5.62;<br>9.51)  | 6.95 (5.70;<br>9.56)  | 7.01 (5.71;<br>9.54)  |
| <b>GALECTIN-9 (Gal9)</b>                        |                       |                       |                       |                       |                       |                       |                       |
| mean ± sd                                       | 8.55 ± 0.30           | 8.52 ± 0.30           | 8.57 ± 0.30           | 8.51 ± 0.30           | 8.54 ± 0.30           | 8.53 ± 0.30           | 8.61 ± 0.30           |
| median<br>(min; max)                            | 8.53 (7.69;<br>9.91)  | 8.51 (7.69;<br>9.91)  | 8.54 (7.71;<br>9.57)  | 8.49 (7.75;<br>9.91)  | 8.52 (7.89;<br>9.47)  | 8.52 (7.69;<br>9.31)  | 8.59 (7.71;<br>9.57)  |
| <b>GASTRIC INTRINSIC FACTOR (GIF)</b>           |                       |                       |                       |                       |                       |                       |                       |
| mean ± sd                                       | 8.91 ± 1.10           | 8.86 ± 1.10           | 8.96 ± 1.00           | 8.81 ± 1.10           | 8.88 ± 1.10           | 8.91 ± 1.00           | 9.03 ± 1.00           |
| median<br>(min; max)                            | 8.88 (3.79;<br>13.05) | 8.82 (4.87;<br>13.05) | 8.95 (3.79;<br>12.94) | 8.72 (4.87;<br>13.05) | 8.89 (4.78;<br>12.55) | 8.88 (5.28;<br>12.83) | 9.09 (3.79;<br>12.94) |
| <b>STEM CELL FACTOR (SCF)</b>                   |                       |                       |                       |                       |                       |                       |                       |

|                                                                |                            |                            |                            |                            |                            |                            |                            |
|----------------------------------------------------------------|----------------------------|----------------------------|----------------------------|----------------------------|----------------------------|----------------------------|----------------------------|
| mean ± sd                                                      | 10.28 ± 0.00               | 10.26 ± 0.00               | 10.30 ± 0.00               | 10.26 ± 0.00               | 10.27 ± 0.00               | 10.27 ± 0.00               | 10.32 ± 0.00               |
| median<br>(min; max)                                           | 10.33<br>(8.37;<br>11.19)  | 10.30<br>(8.45;<br>11.19)  | 10.36<br>(8.37;<br>11.06)  | 10.32<br>(8.45;<br>11.19)  | 10.34<br>(8.37;<br>11.06)  | 10.28<br>(8.84;<br>10.99)  | 10.41<br>(8.98;<br>11.03)  |
| <b>INTERLEUKIN-18 (IL18)</b>                                   |                            |                            |                            |                            |                            |                            |                            |
| mean ± sd                                                      | 8.88 ± 0.60                | 8.86 ± 0.60                | 8.89 ± 0.60                | 8.88 ± 0.50                | 8.87 ± 0.50                | 8.84 ± 0.60                | 8.92 ± 0.60                |
| median<br>(min; max)                                           | 8.87 (6.87;<br>10.82)      | 8.87 (6.87;<br>10.82)      | 8.87 (7.47;<br>10.48)      | 8.88 (7.52;<br>10.67)      | 8.84 (7.67;<br>10.08)      | 8.84 (6.87;<br>10.82)      | 8.87 (7.47;<br>10.48)      |
| <b>FIBROBLAST GROWTH FACTOR 21 (FGF21)</b>                     |                            |                            |                            |                            |                            |                            |                            |
| mean ± sd                                                      | 8.00 ± 1.00                | 7.90 ± 1.40                | 8.10 ± 1.40                | 7.90 ± 1.30                | 8.07 ± 1.40                | 7.90 ± 1.50                | 8.12 ± 1.40                |
| median<br>(min; max)                                           | 7.79 (4.76;<br>14.93)      | 7.70 (4.81;<br>14.68)      | 7.99 (4.76;<br>14.93)      | 7.75 (5.26;<br>12.65)      | 8.01 (5.03;<br>13.74)      | 7.61 (4.81;<br>14.68)      | 7.97 (4.76;<br>14.93)      |
| <b>POLYMERIC IMMUNOGLOBULIN RECEPTOR (PIgR)</b>                |                            |                            |                            |                            |                            |                            |                            |
| mean ± sd                                                      | 3.35 ± 0.10                | 3.33 ± 0.10                | 3.36 ± 0.10                | 3.33 ± 0.10                | 3.35 ± 0.10                | 3.34 ± 0.10                | 3.36 ± 0.10                |
| median<br>(min; max)                                           | 3.34 (2.76;<br>3.73)       | 3.33 (2.94;<br>3.65)       | 3.35 (2.76;<br>3.73)       | 3.32 (2.94;<br>3.63)       | 3.35 (2.78;<br>3.70)       | 3.33 (2.94;<br>3.65)       | 3.36 (2.76;<br>3.73)       |
| <b>RECEPTOR FOR ADVANCED GLYCOSYLATION END PRODUCTS (RAGE)</b> |                            |                            |                            |                            |                            |                            |                            |
| mean ± sd                                                      | 13.09 ± 0.00               | 13.05 ± 0.00               | 13.13 ± 0.00               | 13.04 ± 0.00               | 13.10 ± 0.00               | 13.06 ± 0.00               | 13.15 ± 0.00               |
| median<br>(min; max)                                           | 13.09<br>(11.73;<br>14.34) | 13.07<br>(11.73;<br>14.12) | 13.14<br>(11.96;<br>14.34) | 13.06<br>(12.00;<br>13.96) | 13.09<br>(11.96;<br>14.19) | 13.07<br>(11.73;<br>14.12) | 13.20<br>(12.02;<br>14.34) |
| <b>SUPEROXIDE DISMUTASE, MITOCHONDRIAL (SOD2)</b>              |                            |                            |                            |                            |                            |                            |                            |

|                                            |                     |                     |                     |                     |                     |                     |                     |
|--------------------------------------------|---------------------|---------------------|---------------------|---------------------|---------------------|---------------------|---------------------|
| mean ± sd                                  | 9.67 ± 0.10         | 9.66 ± 0.10         | 9.67 ± 0.10         | 9.66 ± 0.10         | 9.68 ± 0.10         | 9.66 ± 0.10         | 9.66 ± 0.10         |
| median (min; max)                          | 9.67 (9.13; 10.02)  | 9.66 (9.13; 10.02)  | 9.67 (9.21; 9.96)   | 9.67 (9.18; 9.96)   | 9.68 (9.24; 9.96)   | 9.66 (9.13; 10.02)  | 9.67 (9.21; 9.96)   |
| <b>CHYMOTRYPSIN C (CTRC)</b>               |                     |                     |                     |                     |                     |                     |                     |
| mean ± sd                                  | 10.82 ± 1.00        | 10.83 ± 1.00        | 10.81 ± 1.00        | 10.79 ± 1.00        | 10.76 ± 1.00        | 10.87 ± 1.00        | 10.87 ± 1.00        |
| median (min; max)                          | 10.88 (8.26; 12.99) | 10.90 (8.29; 12.72) | 10.86 (8.26; 12.99) | 10.91 (8.29; 12.72) | 10.80 (8.36; 12.49) | 10.88 (8.51; 12.17) | 10.92 (8.26; 12.99) |
| <b>FIBROBLAST GROWTH FACTOR 23 (FGF23)</b> |                     |                     |                     |                     |                     |                     |                     |
| mean ± sd                                  | 3.94 ± 0.60         | 3.91 ± 0.60         | 3.98 ± 1.00         | 3.90 ± 0.60         | 3.93 ± 0.60         | 3.91 ± 0.60         | 4.03 ± 1.00         |
| median (min; max)                          | 3.87 (1.99; 6.85)   | 3.83 (2.48; 6.48)   | 3.90 (1.99; 6.85)   | 3.83 (2.67; 6.48)   | 3.88 (2.73; 6.65)   | 3.83 (2.48; 6.21)   | 3.93 (1.99; 6.85)   |
| <b>SPONDIN-2 (SPON2)</b>                   |                     |                     |                     |                     |                     |                     |                     |
| mean ± sd                                  | 9.81 ± 0.20         | 9.77 ± 0.20         | 9.85 ± 0.20         | 9.77 ± 0.20         | 9.84 ± 0.20         | 9.78 ± 0.20         | 9.86 ± 0.20         |
| median (min; max)                          | 9.82 (9.28; 10.31)  | 9.78 (9.30; 10.29)  | 9.85 (9.28; 10.31)  | 9.77 (9.31; 10.24)  | 9.84 (9.40; 10.26)  | 9.79 (9.30; 10.29)  | 9.86 (9.28; 10.31)  |
| <b>GROWTH HORMONE (GH)</b>                 |                     |                     |                     |                     |                     |                     |                     |
| mean ± sd                                  | 8.81 ± 2.00         | 8.64 ± 1.90         | 8.98 ± 2.00         | 8.77 ± 1.90         | 8.82 ± 2.00         | 8.51 ± 1.90         | 9.13 ± 2.00         |
| median (min; max)                          | 8.91 (3.76; 12.17)  | 8.66 (3.76; 12.14)  | 9.23 (4.23; 12.17)  | 8.87 (4.07; 11.83)  | 8.91 (4.23; 11.99)  | 8.63 (3.76; 12.14)  | 9.45 (4.24; 12.17)  |
| <b>FOLLISTATIN (FS)</b>                    |                     |                     |                     |                     |                     |                     |                     |

|                                        |                       |                       |                       |                       |                       |                       |                       |
|----------------------------------------|-----------------------|-----------------------|-----------------------|-----------------------|-----------------------|-----------------------|-----------------------|
| mean ± sd                              | 9.69 ± 0.60           | 9.74 ± 0.60           | 9.64 ± 0.50           | 9.78 ± 0.60           | 9.63 ± 0.60           | 9.70 ± 0.60           | 9.64 ± 0.50           |
| median<br>(min; max)                   | 9.68 (8.03;<br>11.99) | 9.72 (8.13;<br>11.99) | 9.65 (8.03;<br>11.24) | 9.74 (8.28;<br>11.99) | 9.67 (8.03;<br>11.24) | 9.70 (8.13;<br>11.21) | 9.64 (8.45;<br>11.00) |
| <b>LACTOYLGLUTATHIONE LYASE (GLO1)</b> |                       |                       |                       |                       |                       |                       |                       |
| mean ± sd                              | 7.38 ± 0.70           | 7.38 ± 0.70           | 7.38 ± 0.70           | 7.39 ± 0.70           | 7.36 ± 0.70           | 7.37 ± 0.70           | 7.40 ± 0.70           |
| median<br>(min; max)                   | 7.34 (5.51;<br>9.98)  | 7.32 (5.63;<br>9.98)  | 7.36 (5.51;<br>9.73)  | 7.30 (6.05;<br>9.62)  | 7.34 (5.51;<br>9.46)  | 7.33 (5.63;<br>9.98)  | 7.37 (5.55;<br>9.73)  |
| <b>SLAM FAMILY MEMBER 5 (CD84)</b>     |                       |                       |                       |                       |                       |                       |                       |
| mean ± sd                              | 5.27 ± 0.40           | 5.26 ± 0.40           | 5.28 ± 0.40           | 5.27 ± 0.40           | 5.28 ± 0.40           | 5.24 ± 0.40           | 5.28 ± 0.40           |
| median<br>(min; max)                   | 5.24 (4.15;<br>7.23)  | 5.23 (4.15;<br>7.16)  | 5.28 (4.29;<br>7.23)  | 5.25 (4.41;<br>7.16)  | 5.29 (4.29;<br>6.77)  | 5.22 (4.15;<br>7.07)  | 5.23 (4.30;<br>7.23)  |
| <b>PAPPALYSIN-1 (PAPPA)</b>            |                       |                       |                       |                       |                       |                       |                       |
| mean ± sd                              | 2.12 ± 0.30           | 2.12 ± 0.30           | 2.13 ± 0.30           | 2.10 ± 0.30           | 2.11 ± 0.30           | 2.14 ± 0.40           | 2.14 ± 0.30           |
| median<br>(min; max)                   | 2.06 (1.77;<br>3.96)  | 2.04 (1.77;<br>3.79)  | 2.07 (1.77;<br>3.96)  | 2.04 (1.77;<br>2.93)  | 2.05 (1.78;<br>3.05)  | 2.04 (1.77;<br>3.79)  | 2.11 (1.77;<br>3.96)  |
| <b>SERPIN A12 (SERPINA12)</b>          |                       |                       |                       |                       |                       |                       |                       |
| mean ± sd                              | 3.59 ± 1.10           | 3.56 ± 1.00           | 3.62 ± 1.10           | 3.53 ± 1.00           | 3.60 ± 1.10           | 3.58 ± 1.10           | 3.64 ± 1.10           |
| median<br>(min; max)                   | 3.44 (1.35;<br>8.19)  | 3.43 (1.48;<br>7.93)  | 3.48 (1.35;<br>8.19)  | 3.45 (1.58;<br>7.80)  | 3.47 (1.35;<br>8.19)  | 3.42 (1.48;<br>7.93)  | 3.48 (1.65;<br>7.89)  |
| <b>RENIN (REN)</b>                     |                       |                       |                       |                       |                       |                       |                       |

|                                                         |                       |                       |                       |                       |                       |                       |                       |
|---------------------------------------------------------|-----------------------|-----------------------|-----------------------|-----------------------|-----------------------|-----------------------|-----------------------|
| mean ± sd                                               | 8.11 ± 1.00           | 7.92 ± 1.00           | 8.31 ± 1.00           | 7.84 ± 1.00           | 7.97 ± 1.00           | 7.99 ± 1.00           | 8.63 ± 0.90           |
| median<br>(min; max)                                    | 8.15 (4.60;<br>10.36) | 7.89 (4.60;<br>10.27) | 8.34 (5.15;<br>10.36) | 7.80 (4.60;<br>10.27) | 7.97 (5.15;<br>10.36) | 7.99 (5.41;<br>10.20) | 8.65 (6.22;<br>10.30) |
| <b>2,4-DIENOYL-COA-REDUCTASE, MITOCHONDRIAL (DECR1)</b> |                       |                       |                       |                       |                       |                       |                       |
| mean ± sd                                               | 4.52 ± 1.10           | 4.68 ± 1.10           | 4.36 ± 1.00           | 4.62 ± 1.10           | 4.39 ± 1.00           | 4.73 ± 1.10           | 4.33 ± 1.10           |
| median<br>(min; max)                                    | 4.34 (2.45;<br>10.67) | 4.52 (2.45;<br>10.67) | 4.16 (2.51;<br>9.12)  | 4.40 (2.67;<br>10.67) | 4.17 (2.51;<br>9.12)  | 4.62 (2.45;<br>9.87)  | 4.11 (2.53;<br>8.55)  |
| <b>TYROSINE-PROTEIN KINASE MER (MERTK)</b>              |                       |                       |                       |                       |                       |                       |                       |
| mean ± sd                                               | 6.97 ± 0.00           | 6.95 ± 0.40           | 7.00 ± 0.00           | 6.93 ± 0.40           | 6.97 ± 0.00           | 6.96 ± 0.00           | 7.02 ± 0.00           |
| median<br>(min; max)                                    | 6.95 (4.78;<br>8.55)  | 6.93 (4.78;<br>8.12)  | 6.97 (4.84;<br>8.55)  | 6.95 (5.99;<br>8.05)  | 6.95 (5.60;<br>7.85)  | 6.90 (4.78;<br>8.12)  | 6.99 (4.84;<br>8.55)  |
| <b>KIDNEY INJURY MOLECULE 1 (KIM1)</b>                  |                       |                       |                       |                       |                       |                       |                       |
| mean ± sd                                               | 9.05 ± 0.80           | 9.01 ± 1.00           | 9.10 ± 0.80           | 9.02 ± 1.00           | 9.04 ± 1.00           | 9.01 ± 1.00           | 9.14 ± 0.80           |
| median<br>(min; max)                                    | 8.96 (6.79;<br>11.96) | 8.92 (6.79;<br>11.40) | 9.03 (7.01;<br>11.96) | 8.92 (7.46;<br>11.30) | 8.95 (7.01;<br>11.96) | 8.92 (6.79;<br>11.40) | 9.08 (7.35;<br>11.44) |
| <b>THROMBOSPONDIN-2 (THBS2)</b>                         |                       |                       |                       |                       |                       |                       |                       |
| mean ± sd                                               | 5.96 ± 0.00           | 5.95 ± 0.00           | 5.97 ± 0.00           | 5.95 ± 0.20           | 5.97 ± 0.00           | 5.96 ± 0.00           | 5.97 ± 0.00           |
| median<br>(min; max)                                    | 5.96 (5.40;<br>6.93)  | 5.95 (5.40;<br>6.93)  | 5.96 (5.57;<br>6.63)  | 5.94 (5.40;<br>6.43)  | 5.97 (5.57;<br>6.63)  | 5.96 (5.43;<br>6.93)  | 5.95 (5.57;<br>6.54)  |
| <b>THROMBOMODULIN (TM)</b>                              |                       |                       |                       |                       |                       |                       |                       |

|                                                                     |                            |                            |                            |                            |                            |                            |                            |
|---------------------------------------------------------------------|----------------------------|----------------------------|----------------------------|----------------------------|----------------------------|----------------------------|----------------------------|
| mean ± sd                                                           | 11.17 ± 0.00               | 11.14 ± 0.00               | 11.19 ± 0.00               | 11.14 ± 0.00               | 11.19 ± 0.00               | 11.15 ± 0.00               | 11.20 ± 0.00               |
| median<br>(min; max)                                                | 11.15<br>(9.94;<br>12.31)  | 11.14<br>(10.16;<br>12.20) | 11.20<br>(9.94;<br>12.31)  | 11.15<br>(10.16;<br>11.83) | 11.21<br>(9.94;<br>11.99)  | 11.12<br>(10.16;<br>12.20) | 11.20<br>(10.33;<br>12.31) |
| <b>V-SET AND IMMUNOGLOBULIN DOMAIN-CONTAINING PROTEIN 2 (VSIG2)</b> |                            |                            |                            |                            |                            |                            |                            |
| mean ± sd                                                           | 4.93 ± 0.70                | 4.85 ± 0.60                | 5.01 ± 1.00                | 4.87 ± 0.60                | 4.99 ± 1.00                | 4.84 ± 0.60                | 5.03 ± 1.00                |
| median<br>(min; max)                                                | 4.82 (3.07;<br>8.24)       | 4.74<br>(3.07;<br>7.32)    | 4.92<br>(3.23;<br>8.24)    | 4.74<br>(3.07;<br>7.32)    | 4.88<br>(3.57;<br>8.24)    | 4.75<br>(3.37;<br>6.77)    | 4.92<br>(3.23;<br>7.43)    |
| <b>ALPHA-1-MICROGLOBULIN/BIKUNIN PRECURSOR (AMBP)</b>               |                            |                            |                            |                            |                            |                            |                            |
| mean ± sd                                                           | 8.02 ± 0.00                | 8.00 ± 0.00                | 8.04 ± 0.00                | 8.01 ± 0.00                | 8.02 ± 0.00                | 7.99 ± 0.00                | 8.06 ± 0.20                |
| median<br>(min; max)                                                | 8.02 (7.25;<br>8.55)       | 8.01<br>(7.28;<br>8.55)    | 8.04<br>(7.25;<br>8.54)    | 8.02<br>(7.52;<br>8.55)    | 8.02<br>(7.44;<br>8.51)    | 8.00<br>(7.28;<br>8.43)    | 8.08<br>(7.25;<br>8.54)    |
| <b>PROLARGIN (PRELP)</b>                                            |                            |                            |                            |                            |                            |                            |                            |
| mean ± sd                                                           | 8.34 ± 0.20                | 8.33 ± 0.20                | 8.35 ± 0.20                | 8.34 ± 0.20                | 8.35 ± 0.20                | 8.32 ± 0.20                | 8.36 ± 0.20                |
| median<br>(min; max)                                                | 8.35 (7.24;<br>9.10)       | 8.35<br>(7.61;<br>8.83)    | 8.35<br>(7.24;<br>9.10)    | 8.36<br>(7.68;<br>8.83)    | 8.35<br>(7.24;<br>8.84)    | 8.34<br>(7.61;<br>8.83)    | 8.36<br>(7.34;<br>9.10)    |
| <b>HEME OXYGENASE 1 (HO1)</b>                                       |                            |                            |                            |                            |                            |                            |                            |
| mean ± sd                                                           | 12.48 ± 0.00               | 12.46 ± 0.00               | 12.49 ± 0.00               | 12.48 ± 0.00               | 12.52 ± 0.00               | 12.44 ± 0.00               | 12.47 ± 0.00               |
| median<br>(min; max)                                                | 12.51<br>(10.18;<br>13.66) | 12.51<br>(10.35;<br>13.65) | 12.52<br>(10.18;<br>13.66) | 12.52<br>(10.89;<br>13.47) | 12.54<br>(10.18;<br>13.38) | 12.47<br>(10.35;<br>13.65) | 12.48<br>(10.22;<br>13.66) |
| <b>LYMPHOTACTIN (XCL1)</b>                                          |                            |                            |                            |                            |                            |                            |                            |

|                                                                          |                    |                    |                    |                    |                   |                    |                    |
|--------------------------------------------------------------------------|--------------------|--------------------|--------------------|--------------------|-------------------|--------------------|--------------------|
| mean ± sd                                                                | 5.68 ± 0.60        | 5.67 ± 0.60        | 5.69 ± 0.60        | 5.71 ± 0.50        | 5.71 ± 0.50       | 5.65 ± 0.60        | 5.68 ± 0.70        |
| median (min; max)                                                        | 5.66 (3.95; 9.33)  | 5.66 (3.95; 9.33)  | 5.66 (4.04; 9.33)  | 5.70 (4.24; 7.03)  | 5.68 (4.17; 6.95) | 5.63 (3.95; 9.33)  | 5.61 (4.04; 9.33)  |
| <b>PRO-INTERLEUKIN-16 (IL16)</b>                                         |                    |                    |                    |                    |                   |                    |                    |
| mean ± sd                                                                | 7.55 ± 0.50        | 7.55 ± 0.50        | 7.55 ± 0.50        | 7.56 ± 0.50        | 7.55 ± 0.50       | 7.54 ± 0.50        | 7.54 ± 0.50        |
| median (min; max)                                                        | 7.55 (5.05; 9.86)  | 7.55 (5.05; 9.86)  | 7.53 (5.31; 9.23)  | 7.57 (5.67; 9.86)  | 7.57 (6.10; 9.03) | 7.55 (5.05; 9.40)  | 7.53 (5.31; 9.23)  |
| <b>SORTILIN (SORT1)</b>                                                  |                    |                    |                    |                    |                   |                    |                    |
| mean ± sd                                                                | 9.15 ± 0.30        | 9.15 ± 0.30        | 9.14 ± 0.30        | 9.15 ± 0.30        | 9.14 ± 0.20       | 9.15 ± 0.30        | 9.15 ± 0.30        |
| median (min; max)                                                        | 9.13 (8.33; 10.14) | 9.13 (8.33; 10.14) | 9.13 (8.39; 10.05) | 9.14 (8.47; 10.14) | 9.15 (8.58; 9.81) | 9.13 (8.33; 10.03) | 9.12 (8.39; 10.05) |
| <b>CARCINOEMBRYONIC ANTIGEN-RELATED CELL ADHESION MOLECULE (CEACAM8)</b> |                    |                    |                    |                    |                   |                    |                    |
| mean ± sd                                                                | 5.06 ± 0.70        | 5.03 ± 1.00        | 5.09 ± 0.80        | 4.99 ± 1.00        | 4.99 ± 1.00       | 5.07 ± 0.70        | 5.18 ± 0.80        |
| median (min; max)                                                        | 4.93 (3.48; 8.59)  | 4.90 (3.48; 8.59)  | 4.94 (3.53; 8.30)  | 4.90 (3.48; 8.59)  | 4.91 (3.53; 8.14) | 4.92 (3.68; 8.28)  | 5.06 (3.70; 8.30)  |
| <b>PENTRAXIN-RELATED PROTEIN PTX3 (PTX3)</b>                             |                    |                    |                    |                    |                   |                    |                    |
| mean ± sd                                                                | 4.21 ± 0.50        | 4.28 ± 0.40        | 4.14 ± 0.50        | 4.28 ± 0.40        | 4.13 ± 0.50       | 4.27 ± 0.40        | 4.15 ± 0.50        |
| median (min; max)                                                        | 4.18 (2.79; 6.78)  | 4.26 (3.10; 5.81)  | 4.11 (2.79; 6.78)  | 4.26 (3.20; 5.81)  | 4.09 (2.95; 6.77) | 4.25 (3.10; 5.53)  | 4.16 (2.79; 6.78)  |
| <b>P-SELECTIN GLYCOPROTEIN LIGAND (PSGL1)</b>                            |                    |                    |                    |                    |                   |                    |                    |

|                                                                                        |                      |                      |                      |                      |                      |                      |                      |
|----------------------------------------------------------------------------------------|----------------------|----------------------|----------------------|----------------------|----------------------|----------------------|----------------------|
| mean ± sd                                                                              | 4.70 ± 0.30          | 4.71 ± 0.30          | 4.69 ± 0.30          | 4.73 ± 0.30          | 4.72 ± 0.30          | 4.68 ± 0.30          | 4.67 ± 0.30          |
| median (min; max)                                                                      | 4.69 (3.51; 5.61)    | 4.70 (3.61; 5.61)    | 4.68 (3.51; 5.49)    | 4.73 (3.66; 5.43)    | 4.70 (3.87; 5.38)    | 4.68 (3.61; 5.61)    | 4.66 (3.51; 5.49)    |
| <b>C-C MOTIF CHEMOKINE LIGAND 17 (CCL17)</b>                                           |                      |                      |                      |                      |                      |                      |                      |
| mean ± sd                                                                              | 8.61 ± 0.70          | 8.61 ± 0.70          | 8.61 ± 0.70          | 8.62 ± 0.70          | 8.61 ± 0.70          | 8.60 ± 0.70          | 8.62 ± 0.60          |
| median (min; max)                                                                      | 8.57 (6.84; 11.77)   | 8.56 (6.84; 11.77)   | 8.57 (6.97; 11.07)   | 8.60 (6.84; 11.72)   | 8.57 (6.97; 11.07)   | 8.54 (7.16; 11.77)   | 8.57 (7.17; 10.32)   |
| <b>C-C MOTIF CHEMOKINE LIGAND 3 (CCL3)</b>                                             |                      |                      |                      |                      |                      |                      |                      |
| mean ± sd                                                                              | 7.31 ± 0.70          | 7.26 ± 0.60          | 7.36 ± 0.70          | 7.25 ± 0.50          | 7.32 ± 0.60          | 7.27 ± 0.70          | 7.40 ± 0.80          |
| median (min; max)                                                                      | 7.26 (5.86; 13.78)   | 7.21 (5.91; 12.83)   | 7.30 (5.86; 13.78)   | 7.23 (5.91; 9.09)    | 7.31 (5.86; 9.97)    | 7.18 (6.04; 12.83)   | 7.30 (6.12; 13.78)   |
| <b>MATRIX METALLOPROTEINASE 7 (MMP7)</b>                                               |                      |                      |                      |                      |                      |                      |                      |
| mean ± sd                                                                              | 11.56 ± 0.00         | 11.53 ± 0.00         | 11.59 ± 0.00         | 11.52 ± 0.00         | 11.55 ± 0.00         | 11.54 ± 0.00         | 11.62 ± 0.00         |
| median (min; max)                                                                      | 11.57 (10.69; 12.25) | 11.54 (10.69; 12.25) | 11.60 (10.74; 12.23) | 11.53 (10.78; 12.12) | 11.56 (10.99; 12.04) | 11.56 (10.69; 12.25) | 11.64 (10.74; 12.23) |
| <b>LOW AFFINITY IMMUNOGLOBULIN GAMMA FC REGION RECEPTOR II-B (IgG Fc receptor IIB)</b> |                      |                      |                      |                      |                      |                      |                      |
| mean ± sd                                                                              | 4.37 ± 0.90          | 4.35 ± 0.90          | 4.39 ± 0.90          | 4.32 ± 0.90          | 4.36 ± 0.90          | 4.37 ± 0.90          | 4.41 ± 1.00          |
| median (min; max)                                                                      | 4.49 (1.38; 6.60)    | 4.50 (1.50; 6.25)    | 4.49 (1.38; 6.60)    | 4.45 (2.11; 6.25)    | 4.48 (2.24; 6.27)    | 4.56 (1.50; 6.13)    | 4.49 (1.38; 6.60)    |
| <b>MELUSIN (ITGB1BP2)</b>                                                              |                      |                      |                      |                      |                      |                      |                      |



|                                          |                        |                        |                        |                        |                        |                        |                        |
|------------------------------------------|------------------------|------------------------|------------------------|------------------------|------------------------|------------------------|------------------------|
| mean ± sd                                | 3.21 ± 0.80            | 3.22 ± 0.80            | 3.20 ± 0.80            | 3.14 ± 0.80            | 3.18 ± 0.90            | 3.30 ± 0.90            | 3.22 ± 0.70            |
| median<br>(min; max)                     | 2.98 (2.36;<br>7.36)   | 2.97 (2.36;<br>7.36)   | 3.02 (2.36;<br>6.91)   | 2.91 (2.36;<br>7.36)   | 2.93 (2.36;<br>6.91)   | 3.11 (2.37;<br>6.61)   | 3.12 (2.36;<br>5.31)   |
| <b>DECORIN (DCN)</b>                     |                        |                        |                        |                        |                        |                        |                        |
| mean ± sd                                | 5.46 ± 0.30            | 5.43 ± 0.20            | 5.49 ± 0.30            | 5.44 ± 0.20            | 5.49 ± 0.20            | 5.42 ± 0.30            | 5.49 ± 0.30            |
| median<br>(min; max)                     | 5.43 (4.87;<br>6.92)   | 5.40 (4.87;<br>6.89)   | 5.46 (4.94;<br>6.92)   | 5.41 (4.93;<br>6.60)   | 5.45 (5.02;<br>6.42)   | 5.40 (4.87;<br>6.89)   | 5.48 (4.94;<br>6.92)   |
| <b>DICKKOPF-RELATED PROTEIN 1 (Dkk1)</b> |                        |                        |                        |                        |                        |                        |                        |
| mean ± sd                                | 8.10 ± 0.50            | 8.09 ± 0.50            | 8.11 ± 0.50            | 8.08 ± 0.50            | 8.08 ± 0.50            | 8.11 ± 0.50            | 8.13 ± 0.50            |
| median<br>(min; max)                     | 8.06 (6.57;<br>10.44)  | 8.06 (6.81;<br>10.44)  | 8.06 (6.57;<br>10.28)  | 8.06 (6.81;<br>10.04)  | 8.00 (6.80;<br>9.77)   | 8.07 (6.91;<br>10.44)  | 8.11 (6.57;<br>10.28)  |
| <b>LIPOPROTEIN LIPASE (LPL)</b>          |                        |                        |                        |                        |                        |                        |                        |
| mean ± sd                                | 10.20 ± 1.00           | 10.19 ± 1.00           | 10.22 ± 1.00           | 10.19 ± 1.00           | 10.20 ± 1.00           | 10.18 ± 1.00           | 10.23 ± 1.00           |
| median<br>(min; max)                     | 10.29 (7.87;<br>11.17) | 10.29 (8.22;<br>11.08) | 10.29 (7.87;<br>11.17) | 10.30 (8.22;<br>11.03) | 10.29 (8.18;<br>11.16) | 10.29 (8.24;<br>11.08) | 10.31 (7.87;<br>11.17) |
| <b>PROSTATIN (PRSS8)</b>                 |                        |                        |                        |                        |                        |                        |                        |
| mean ± sd                                | 9.57 ± 0.40            | 9.54 ± 0.40            | 9.61 ± 0.40            | 9.55 ± 0.40            | 9.60 ± 0.40            | 9.53 ± 0.40            | 9.61 ± 0.40            |
| median<br>(min; max)                     | 9.60 (8.22;<br>10.63)  | 9.57 (8.22;<br>10.54)  | 9.62 (8.31;<br>10.63)  | 9.59 (8.52;<br>10.54)  | 9.63 (8.31;<br>10.34)  | 9.56 (8.22;<br>10.32)  | 9.62 (8.43;<br>10.63)  |
| <b>AGOUTI-RELATED PROTEIN (AGRP)</b>     |                        |                        |                        |                        |                        |                        |                        |

|                                                               |                    |                    |                    |                    |                    |                    |                    |
|---------------------------------------------------------------|--------------------|--------------------|--------------------|--------------------|--------------------|--------------------|--------------------|
| mean ± sd                                                     | 6.21 ± 0.40        | 6.19 ± 0.40        | 6.23 ± 0.40        | 6.20 ± 0.30        | 6.22 ± 0.40        | 6.18 ± 0.40        | 6.24 ± 0.40        |
| median (min; max)                                             | 6.20 (4.82; 7.73)  | 6.20 (4.83; 7.24)  | 6.21 (4.82; 7.73)  | 6.19 (5.31; 7.24)  | 6.23 (4.82; 7.34)  | 6.20 (4.83; 7.18)  | 6.20 (5.00; 7.73)  |
| <b>PROHEPARIN-BINDING EGF-LIKE GROWTH FACTOR (HB-EGF)</b>     |                    |                    |                    |                    |                    |                    |                    |
| mean ± sd                                                     | 4.55 ± 0.30        | 4.53 ± 0.30        | 4.57 ± 0.30        | 4.54 ± 0.30        | 4.56 ± 0.30        | 4.52 ± 0.30        | 4.58 ± 0.30        |
| median (min; max)                                             | 4.59 (2.22; 5.34)  | 4.56 (2.22; 5.34)  | 4.61 (2.39; 5.26)  | 4.57 (2.99; 5.34)  | 4.60 (2.39; 5.13)  | 4.55 (2.22; 5.20)  | 4.62 (2.44; 5.26)  |
| <b>GROWTH/DIFFERENTIATION FACTOR 2 (GDF2)</b>                 |                    |                    |                    |                    |                    |                    |                    |
| mean ± sd                                                     | 8.25 ± 0.40        | 8.22 ± 0.40        | 8.28 ± 0.40        | 8.21 ± 0.40        | 8.28 ± 0.40        | 8.23 ± 0.40        | 8.28 ± 0.40        |
| median (min; max)                                             | 8.25 (6.01; 10.01) | 8.24 (6.40; 10.01) | 8.28 (6.01; 9.77)  | 8.22 (7.19; 9.43)  | 8.25 (7.25; 9.77)  | 8.24 (6.40; 10.01) | 8.30 (6.01; 9.49)  |
| <b>FATTY ACID BINDING PROTEIN 2 (FABP2)</b>                   |                    |                    |                    |                    |                    |                    |                    |
| mean ± sd                                                     | 9.05 ± 0.80        | 8.98 ± 1.00        | 9.12 ± 0.80        | 9.05 ± 0.70        | 9.14 ± 0.80        | 8.92 ± 0.80        | 9.10 ± 0.90        |
| median (min; max)                                             | 9.04 (6.67; 11.74) | 8.98 (6.67; 11.50) | 9.11 (6.71; 11.74) | 9.00 (6.94; 11.50) | 9.13 (7.16; 11.74) | 8.97 (6.67; 10.89) | 9.10 (6.71; 11.68) |
| <b>THROMBOPOIETIN (THPO)</b>                                  |                    |                    |                    |                    |                    |                    |                    |
| mean ± sd                                                     | 3.10 ± 0.30        | 3.07 ± 0.30        | 3.12 ± 0.30        | 3.10 ± 0.30        | 3.12 ± 0.30        | 3.04 ± 0.00        | 3.12 ± 0.30        |
| median (min; max)                                             | 3.10 (2.01; 4.21)  | 3.09 (2.25; 4.12)  | 3.12 (2.01; 4.21)  | 3.12 (2.30; 4.11)  | 3.12 (2.01; 4.19)  | 3.03 (2.25; 4.12)  | 3.11 (2.37; 4.21)  |
| <b>MACROPHAGE RECEPTOR WITH COLLAGENOUS STRUCTURE (MARCO)</b> |                    |                    |                    |                    |                    |                    |                    |

|                                                |                       |                       |                       |                       |                       |                      |                       |
|------------------------------------------------|-----------------------|-----------------------|-----------------------|-----------------------|-----------------------|----------------------|-----------------------|
| mean ± sd                                      | 7.55 ± 0.20           | 7.54 ± 0.20           | 7.55 ± 0.20           | 7.53 ± 0.20           | 7.54 ± 0.20           | 7.55 ± 0.20          | 7.56 ± 0.20           |
| median<br>(min; max)                           | 7.54 (6.82;<br>8.21)  | 7.53 (6.82;<br>8.18)  | 7.55 (6.90;<br>8.21)  | 7.53 (6.82;<br>8.11)  | 7.55 (6.93;<br>7.96)  | 7.54 (6.84;<br>8.18) | 7.55 (6.90;<br>8.21)  |
| <b>GASTROTROPIN (GT)</b>                       |                       |                       |                       |                       |                       |                      |                       |
| mean ± sd                                      | 2.31 ± 0.60           | 2.25 ± 0.60           | 2.37 ± 0.70           | 2.30 ± 0.70           | 2.40 ± 0.70           | 2.20 ± 0.60          | 2.34 ± 0.70           |
| median<br>(min; max)                           | 2.25 (0.61;<br>5.12)  | 2.20 (0.85;<br>4.81)  | 2.33 (0.61;<br>5.12)  | 2.21 (0.98;<br>4.81)  | 2.38 (0.65;<br>5.12)  | 2.17 (0.85;<br>4.05) | 2.27 (0.61;<br>4.68)  |
| <b>BRAIN NATRIURETIC PEPTIDE (BNP)</b>         |                       |                       |                       |                       |                       |                      |                       |
| mean ± sd                                      | 3.12 ± 1.10           | 3.13 ± 1.10           | 3.11 ± 1.10           | 3.05 ± 1.00           | 3.21 ± 1.10           | 3.20 ± 1.20          | 3.00 ± 1.00           |
| median<br>(min; max)                           | 2.91 (1.61;<br>6.86)  | 2.89 (1.61;<br>6.86)  | 2.99 (1.62;<br>6.41)  | 2.77 (1.61;<br>6.01)  | 3.20 (1.62;<br>6.02)  | 2.98 (1.61;<br>6.86) | 2.72 (1.64;<br>6.41)  |
| <b>MATRIX METALLOPROTEINASE 12 (MMP12)</b>     |                       |                       |                       |                       |                       |                      |                       |
| mean ± sd                                      | 8.09 ± 0.80           | 8.09 ± 0.80           | 8.10 ± 0.80           | 8.10 ± 0.80           | 8.10 ± 0.80           | 8.07 ± 0.80          | 8.10 ± 0.80           |
| median<br>(min; max)                           | 8.08 (5.72;<br>11.40) | 8.10 (5.72;<br>10.03) | 8.06 (5.74;<br>11.40) | 8.14 (5.72;<br>10.03) | 8.06 (5.74;<br>10.34) | 8.07 (6.01;<br>9.87) | 8.06 (6.04;<br>11.40) |
| <b>ANGIOTENSIN-CONVERTING ENZYME 2 (ACE2)</b>  |                       |                       |                       |                       |                       |                      |                       |
| mean ± sd                                      | 4.36 ± 0.70           | 4.35 ± 0.70           | 4.37 ± 0.70           | 4.36 ± 0.70           | 4.37 ± 0.70           | 4.33 ± 0.70          | 4.36 ± 0.70           |
| median<br>(min; max)                           | 4.25 (2.98;<br>6.68)  | 4.26 (2.98;<br>6.50)  | 4.24 (3.06;<br>6.68)  | 4.32 (2.98;<br>6.50)  | 4.29 (3.06;<br>6.68)  | 4.20 (3.03;<br>6.32) | 4.22 (3.15;<br>6.31)  |
| <b>PROGRAMMED CELL DEATH 1 LIGAND 2 (PDL2)</b> |                       |                       |                       |                       |                       |                      |                       |

|                                                                          |                      |                      |                      |                      |                      |                      |                      |
|--------------------------------------------------------------------------|----------------------|----------------------|----------------------|----------------------|----------------------|----------------------|----------------------|
| mean ± sd                                                                | 4.02 ± 0.00          | 4.01 ± 0.00          | 4.04 ± 0.00          | 3.99 ± 0.00          | 4.02 ± 0.00          | 4.03 ± 0.00          | 4.05 ± 0.00          |
| median (min; max)                                                        | 4.04 (2.53; 5.56)    | 4.03 (2.53; 5.56)    | 4.05 (2.67; 5.27)    | 4.01 (2.99; 5.04)    | 4.04 (2.99; 5.04)    | 4.04 (2.53; 5.56)    | 4.05 (2.67; 5.27)    |
| <b>CATHEPSIN L1 (CTSL1)</b>                                              |                      |                      |                      |                      |                      |                      |                      |
| mean ± sd                                                                | 7.53 ± 0.40          | 7.49 ± 0.40          | 7.58 ± 0.40          | 7.49 ± 0.40          | 7.56 ± 0.40          | 7.49 ± 0.40          | 7.59 ± 0.40          |
| median (min; max)                                                        | 7.50 (6.53; 8.81)    | 7.45 (6.53; 8.74)    | 7.53 (6.69; 8.81)    | 7.47 (6.53; 8.74)    | 7.52 (6.69; 8.71)    | 7.45 (6.79; 8.60)    | 7.54 (6.77; 8.81)    |
| <b>OSTEOCLAST-ASSOCIATED IMMUNOGLOBULINE-LIKE RECEPTOR (hOSCAR)</b>      |                      |                      |                      |                      |                      |                      |                      |
| mean ± sd                                                                | 11.78 ± 0.00         | 11.76 ± 0.00         | 11.80 ± 0.00         | 11.74 ± 0.00         | 11.77 ± 0.00         | 11.78 ± 0.00         | 11.83 ± 0.00         |
| median (min; max)                                                        | 11.79 (10.63; 12.37) | 11.77 (10.84; 12.37) | 11.82 (10.63; 12.34) | 11.74 (10.97; 12.27) | 11.78 (10.63; 12.30) | 11.80 (10.84; 12.37) | 11.85 (10.71; 12.34) |
| <b>TUMOR NECROSIS FACTOR RECEPTOR SUPERFAMILY MEMBER 13B (TNFRSF13B)</b> |                      |                      |                      |                      |                      |                      |                      |
| mean ± sd                                                                | 9.26 ± 0.40          | 9.24 ± 0.40          | 9.28 ± 0.40          | 9.22 ± 0.40          | 9.25 ± 0.40          | 9.26 ± 0.40          | 9.31 ± 0.50          |
| median (min; max)                                                        | 9.21 (8.25; 11.08)   | 9.21 (8.25; 10.97)   | 9.21 (8.31; 11.08)   | 9.19 (8.25; 10.97)   | 9.20 (8.31; 11.02)   | 9.23 (8.30; 10.53)   | 9.22 (8.34; 11.08)   |
| <b>TRANSGLUTAMINASE 2 (TGM2)</b>                                         |                      |                      |                      |                      |                      |                      |                      |
| mean ± sd                                                                | 6.10 ± 1.00          | 6.14 ± 1.00          | 6.07 ± 1.00          | 6.13 ± 1.00          | 6.04 ± 1.00          | 6.15 ± 1.00          | 6.09 ± 1.10          |
| median (min; max)                                                        | 5.83 (4.18; 10.81)   | 5.87 (4.18; 10.42)   | 5.80 (4.38; 10.81)   | 5.85 (4.76; 10.42)   | 5.78 (4.86; 9.48)    | 5.87 (4.18; 10.17)   | 5.80 (4.38; 10.81)   |
| <b>LEPTIN (LEP)</b>                                                      |                      |                      |                      |                      |                      |                      |                      |

|                                                     |                    |                    |                    |                    |                    |                    |                    |
|-----------------------------------------------------|--------------------|--------------------|--------------------|--------------------|--------------------|--------------------|--------------------|
| mean ± sd                                           | 8.03 ± 1.00        | 7.99 ± 1.00        | 8.07 ± 1.00        | 7.97 ± 1.00        | 8.02 ± 1.00        | 8.00 ± 1.00        | 8.12 ± 1.10        |
| median (min; max)                                   | 8.08 (3.55; 11.24) | 8.02 (4.74; 11.24) | 8.15 (3.55; 10.45) | 7.99 (5.36; 10.23) | 8.08 (5.00; 10.45) | 8.06 (4.74; 11.24) | 8.27 (3.55; 10.14) |
| <b>CARBONIC ANHYDRASE 5A (CA5A)</b>                 |                    |                    |                    |                    |                    |                    |                    |
| mean ± sd                                           | 3.16 ± 1.00        | 3.19 ± 1.00        | 3.13 ± 0.90        | 3.20 ± 0.90        | 3.18 ± 0.90        | 3.17 ± 1.00        | 3.09 ± 0.90        |
| median (min; max)                                   | 2.98 (1.81; 8.89)  | 3.01 (1.81; 8.89)  | 2.92 (1.84; 6.17)  | 3.08 (1.82; 6.42)  | 2.99 (1.84; 5.95)  | 2.97 (1.81; 8.89)  | 2.85 (1.84; 6.17)  |
| <b>HEAT SHOCK 27 KDA PROTEIN (HSP27)</b>            |                    |                    |                    |                    |                    |                    |                    |
| mean ± sd                                           | 9.57 ± 0.70        | 9.53 ± 0.70        | 9.62 ± 0.70        | 9.53 ± 0.70        | 9.56 ± 0.70        | 9.52 ± 0.70        | 9.67 ± 0.70        |
| median (min; max)                                   | 9.60 (7.23; 11.37) | 9.51 (7.72; 11.12) | 9.67 (7.23; 11.37) | 9.48 (7.72; 11.12) | 9.61 (7.23; 11.12) | 9.58 (7.75; 11.07) | 9.71 (7.58; 11.37) |
| <b>T-CELL SURFACE GLYCOPROTEIN CD4 (CD4)</b>        |                    |                    |                    |                    |                    |                    |                    |
| mean ± sd                                           | 5.68 ± 0.30        | 5.68 ± 0.30        | 5.69 ± 0.30        | 5.68 ± 0.30        | 5.67 ± 0.30        | 5.68 ± 0.30        | 5.70 ± 0.30        |
| median (min; max)                                   | 5.67 (4.71; 6.74)  | 5.68 (4.74; 6.67)  | 5.67 (4.71; 6.74)  | 5.68 (4.74; 6.67)  | 5.66 (4.71; 6.74)  | 5.68 (4.88; 6.58)  | 5.69 (4.81; 6.72)  |
| <b>NF-KAPPA-B ESSENTIAL MODULATOR (NEMO)</b>        |                    |                    |                    |                    |                    |                    |                    |
| mean ± sd                                           | 4.45 ± 0.80        | 4.48 ± 0.70        | 4.42 ± 0.80        | 4.47 ± 0.70        | 4.41 ± 0.80        | 4.49 ± 0.80        | 4.44 ± 0.80        |
| median (min; max)                                   | 4.34 (2.60; 8.54)  | 4.34 (2.66; 8.54)  | 4.35 (2.60; 7.63)  | 4.35 (2.90; 8.54)  | 4.33 (2.60; 7.63)  | 4.34 (2.66; 7.05)  | 4.36 (2.79; 7.50)  |
| <b>VASCULAR ENDOTHELIAL GROWTH FACTOR D (VEGFD)</b> |                    |                    |                    |                    |                    |                    |                    |

|                                               |                    |                    |                    |                    |                    |                    |                   |
|-----------------------------------------------|--------------------|--------------------|--------------------|--------------------|--------------------|--------------------|-------------------|
| mean ± sd                                     | 8.31 ± 0.40        | 8.31 ± 0.40        | 8.31 ± 0.40        | 8.33 ± 0.30        | 8.36 ± 0.40        | 8.30 ± 0.40        | 8.26 ± 0.40       |
| median (min; max)                             | 8.33 (7.04; 9.75)  | 8.32 (7.17; 9.75)  | 8.33 (7.04; 9.74)  | 8.35 (7.41; 9.08)  | 8.36 (7.12; 9.14)  | 8.31 (7.17; 9.75)  | 8.27 (7.04; 9.74) |
| <b>POLY [ADP-RIBOSE] POLYMERASE 1 (PARP1)</b> |                    |                    |                    |                    |                    |                    |                   |
| mean ± sd                                     | 2.55 ± 0.90        | 2.60 ± 1.10        | 2.50 ± 0.80        | 2.66 ± 1.30        | 2.54 ± 0.90        | 2.54 ± 0.70        | 2.48 ± 0.70       |
| median (min; max)                             | 2.23 (1.80; 7.78)  | 2.18 (1.80; 7.78)  | 2.24 (1.80; 6.99)  | 2.20 (1.80; 7.78)  | 2.25 (1.80; 6.99)  | 2.18 (1.81; 4.87)  | 2.22 (1.80; 5.86) |
| <b>HYDROXYACID OXIDASE 1 (HAOX1)</b>          |                    |                    |                    |                    |                    |                    |                   |
| mean ± sd                                     | 5.82 ± 1.50        | 5.95 ± 1.00        | 5.70 ± 1.40        | 6.03 ± 1.00        | 5.80 ± 1.40        | 5.88 ± 1.50        | 5.59 ± 1.40       |
| median (min; max)                             | 5.66 (2.87; 11.05) | 5.74 (3.17; 11.05) | 5.53 (2.87; 10.34) | 5.85 (3.46; 10.16) | 5.71 (2.87; 10.34) | 5.66 (3.17; 11.05) | 5.37 (3.00; 9.66) |

Suppl. Table S3a: Significant associations between the left ventricular mass index (LVMI) and plasma biomarker levels in HFpEF patients at baseline

| Biomarker | LVMI [g/m <sup>2</sup> ] |         |
|-----------|--------------------------|---------|
|           | b-coefficient (95%-CI)   | p-value |
| BNP       | 5.79 (2.40 to 9.18)      | 0.001   |
| MMP12     | -4.49 (-8.26 to -0.73)   | 0.020   |
| DCN       | 13.38 (1.08 to 25.67)    | 0.033   |

Suppl. Table S3b: Significant associations between plasma NT-proBNP concentrations and plasma biomarker levels in HFpEF patients at baseline

| Biomarker | NT-proBNP[ng/L]        |         |
|-----------|------------------------|---------|
|           | b-coefficient (95%-CI) | p-value |
| BNP       | 0.80 (0.70 to 0.90)    | <0.001* |
| VEGFD     | 1.13 (0.73 to 1.53)    | <0.001* |
| ADM       | 0.73 (0.45 to 1.01)    | <0.001* |
| PTX3      | 0.80 (0.47 to 1.13)    | <0.001* |
| HB-EGF    | 1.03 (0.46 to 1.60)    | <0.001* |
| PRELP     | 1.22 (0.48 to 1.98)    | 0.002*  |
| IDUA      | -0.37 (-0.63 to -0.12) | 0.004*  |
| FS        | 0.35 (0.11 to 0.59)    | 0.004*  |
| RAGE      | 0.52 (0.15 to 0.88)    | 0.005*  |
| CD4       | 0.69 (0.20 to 1.81)    | 0.006*  |
| AGRP      | 0.59 (0.17 to 1.01)    | 0.006   |
| DECR1     | 0.17 (0.04 to 0.30)    | 0.011   |
| CXCL1     | -0.25 (-0.45 to -0.05) | 0.015   |
| BOC       | 0.75 (0.14 to 1.35)    | 0.016   |
| IL17D     | 0.39 (0.07 to 0.7)     | 0.018   |
| FGF23     | 0.28 (0.04 to 0.52)    | 0.021   |
| ADAMTS13  | -1.30 (-2.42 to -0.19) | 0.022   |
| TF        | 0.60 (0.08 to 1.11)    | 0.023   |
| GH        | 0.09 (0.01 to 0.17)    | 0.026   |
| SPON2     | -0.99 (-1.89 to -0.08) | 0.033   |
| LPL       | 0.32 (0.01 to 0.64)    | 0.044   |
| PlgR      | 1.22 (0.01 to 2.43)    | 0.049   |

Suppl. Table 3c: Significant associations between SF-36 physical functioning scale score and plasma biomarker levels in HFpEF patients at baseline

| Biomarker           | SF-36 score               |         |
|---------------------|---------------------------|---------|
|                     | b-coefficient (95%-CI)    | p-value |
| Gal9                | -21.87 (-28.96 to -14.78) | <0.001* |
| IL1ra               | -9.50 (-12.62 to -6.39)   | <0.001* |
| TNFRSF11A           | -13.52 (-18.49 to -8.55)  | <0.001* |
| TRAILR2             | -15.15 (-20.81 to -9.50)  | <0.001* |
| VSIG2               | -8.56 (-12.16 to -4.95)   | <0.001* |
| LEP                 | -6.46 (-9.26 to -3.66)    | <0.001* |
| ADM                 | -8.76 (-12.72 to -4.81)   | <0.001* |
| FGF23               | -8.09 (-11.82 to -4.35)   | <0.001* |
| PGF                 | -14.59 (-21.43 to -7.76)  | <0.001* |
| AMBP                | -25.33 (-37.19 to -13.46) | <0.001* |
| SPON2               | -29.59 (-43.73 to -15.45) | <0.001* |
| TM                  | -14.13 (-20.93 to -7.34)  | <0.001* |
| IL27                | -14.42 (-21.57 to -7.27)  | <0.001* |
| TIE2                | -16.71 (-25.01 to -8.40)  | <0.001* |
| CD84                | -11.34 (-17.07 to -5.60)  | <0.001* |
| IL6                 | -5.33 (-8.05 to -2.61)    | <0.001* |
| SORT1               | -16.06 (-24.58 to -7.55)  | <0.001* |
| THBS2               | -23.85 (-36.85 to -10.85) | <0.001* |
| CD4                 | -13.95 (-21.66 to -6.24)  | <0.001* |
| PDL2                | -9.34 (-15.13 to -3.54)   | 0.002*  |
| REN                 | -3.59 (-5.84 to -1.34)    | 0.002*  |
| DCN                 | -17.31 (-28.18 to -6.45)  | 0.002*  |
| FGF21               | -2.58 (-4.21 to -0.95)    | 0.002*  |
| KIM1                | -4.39 (-7.23 to -1.55)    | 0.003*  |
| GIF                 | -3.29 (-5.42 to -1.16)    | 0.003*  |
| FS                  | -5.98 (-9.91 to -2.06)    | 0.003*  |
| MERTK               | -8.80 (-14.81 to -2.80)   | 0.004*  |
| Dkk1                | -6.94 (-11.68 to -2.19)   | 0.004*  |
| GDF2                | -8.96 (-15.24 to -2.69)   | 0.005*  |
| IgG Fc receptor IIb | -3.54 (-6.03 to -1.04)    | 0.006*  |
| TF                  | -11.27 (-19.29 to -3.25)  | 0.006*  |
| CXCL1               | -4.43 (-7.58 to -1.27)    | 0.006*  |
| IL4RA               | -8.44 (-14.55 to -2.34)   | 0.007*  |
| MARCO               | -14.61 (-25.21 to -4.01)  | 0.007*  |
| PAR1                | -7.95 (-13.72 to -2.18)   | 0.007*  |
| HAOX1               | -2.14 (-3.69 to -0.59)    | 0.007*  |
| TNFRSF10A           | -6.57 (-11.49 to -1.64)   | 0.009*  |
| PRSS27              | -6.79 (-11.88 to -1.70)   | 0.009*  |
| CTSL1               | -8.45 (-14.79 to -2.11)   | 0.009*  |
| THPO                | -10.02 (-17.58 to -2.47)  | 0.009*  |
| PAPPA               | -12.71 (-22.46 to -2.96)  | 0.011*  |
| hOSCAR              | -13.84 (-24.70 to -2.98)  | 0.013*  |
| MMP7                | -10.58 (-19.05 to -2.11)  | 0.014*  |
| CCL3                | -4.37 (-7.95 to -0.78)    | 0.017*  |
| XCL1                | -4.94 (-9.00 to -0.89)    | 0.017*  |
| STK4                | -3.90 (-7.15 to -0.66)    | 0.019*  |



|                 |                         |        |
|-----------------|-------------------------|--------|
| <b>AGRP</b>     | -7.64 (-14.08 to -1.21) | 0.020* |
| <b>CA5A</b>     | -2.97 (-5.51 to -0.44)  | 0.022* |
| <b>PTX3</b>     | -6.09 (-11.46 to -0.73) | 0.026* |
| <b>PRSS8</b>    | -7.65 (-14.40 to -0.89) | 0.027* |
| <b>ITGB1BP2</b> | -4.10 (-7.91 to -0.28)  | 0.036  |

Linear regression analyses between plasma biomarkers and LVMI (a), plasma NT-proBNP concentrations (b) and the SF-36 physical functioning scale score (c) including age and sex as co-variables were conducted. Proteins with significant associations are ordered by significance in the respective sections; \* indicates that statistical significance remains after adjustment for multiple testing.

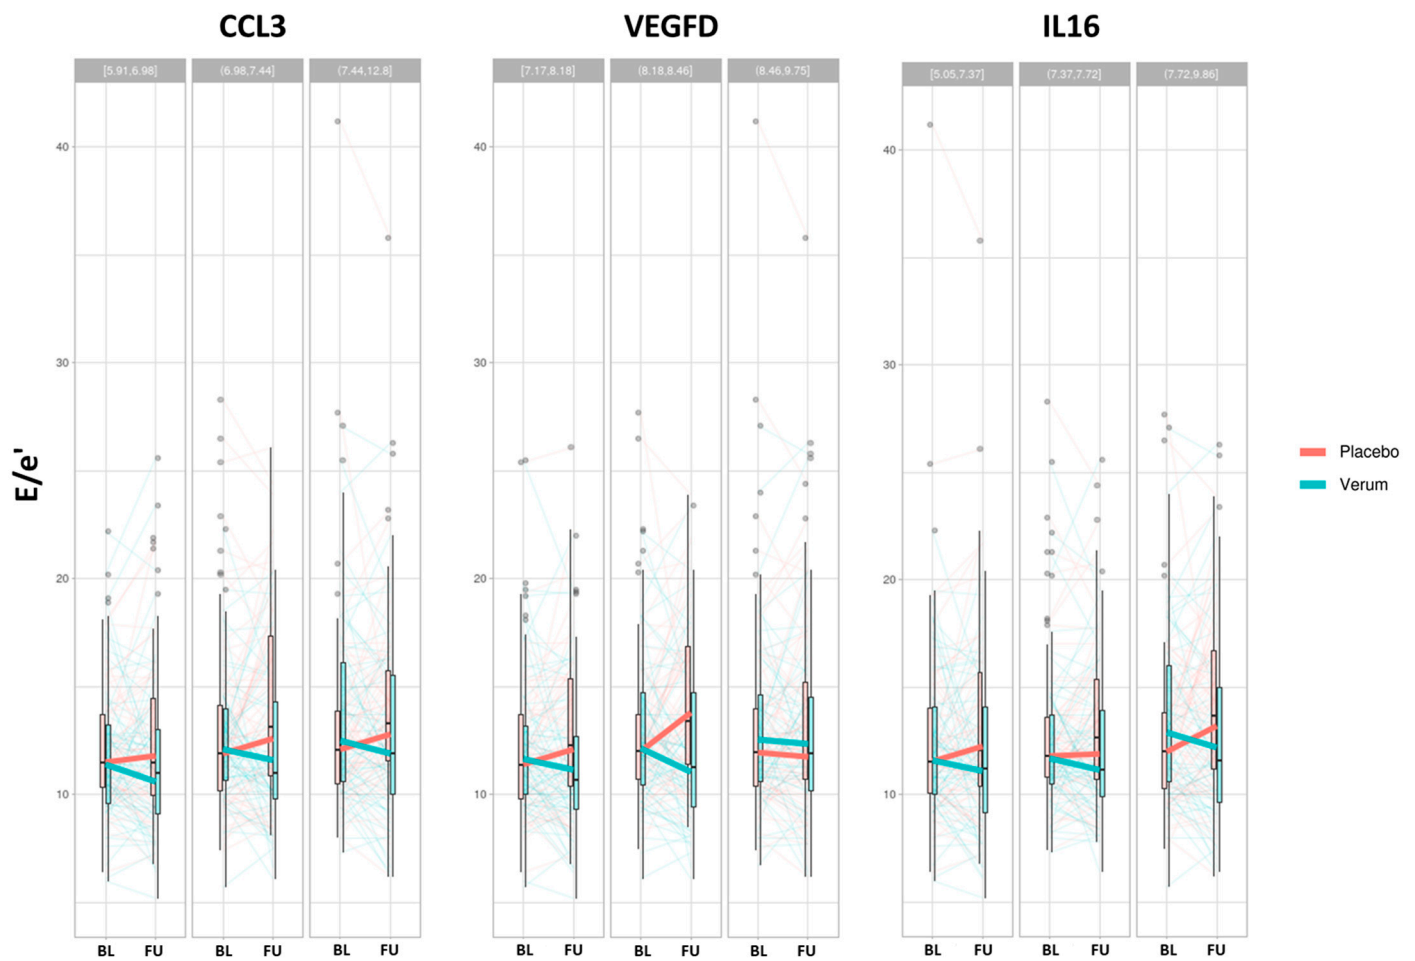

**Suppl. Figure S1: Plasma biomarkers with predictive value in regard to spironolactone-mediated effects on relative E/e' changes in HFpEF patients.** The effect of the spironolactone treatment (verum vs placebo) on relative changes of E/e' from baseline (BL) to twelve months follow up (FU) was assessed for interaction with BL plasma biomarker expression levels. For visualization purposes, patients were classified by BL expression level tertiles of the respective protein. Only proteins with a significant interaction are shown.

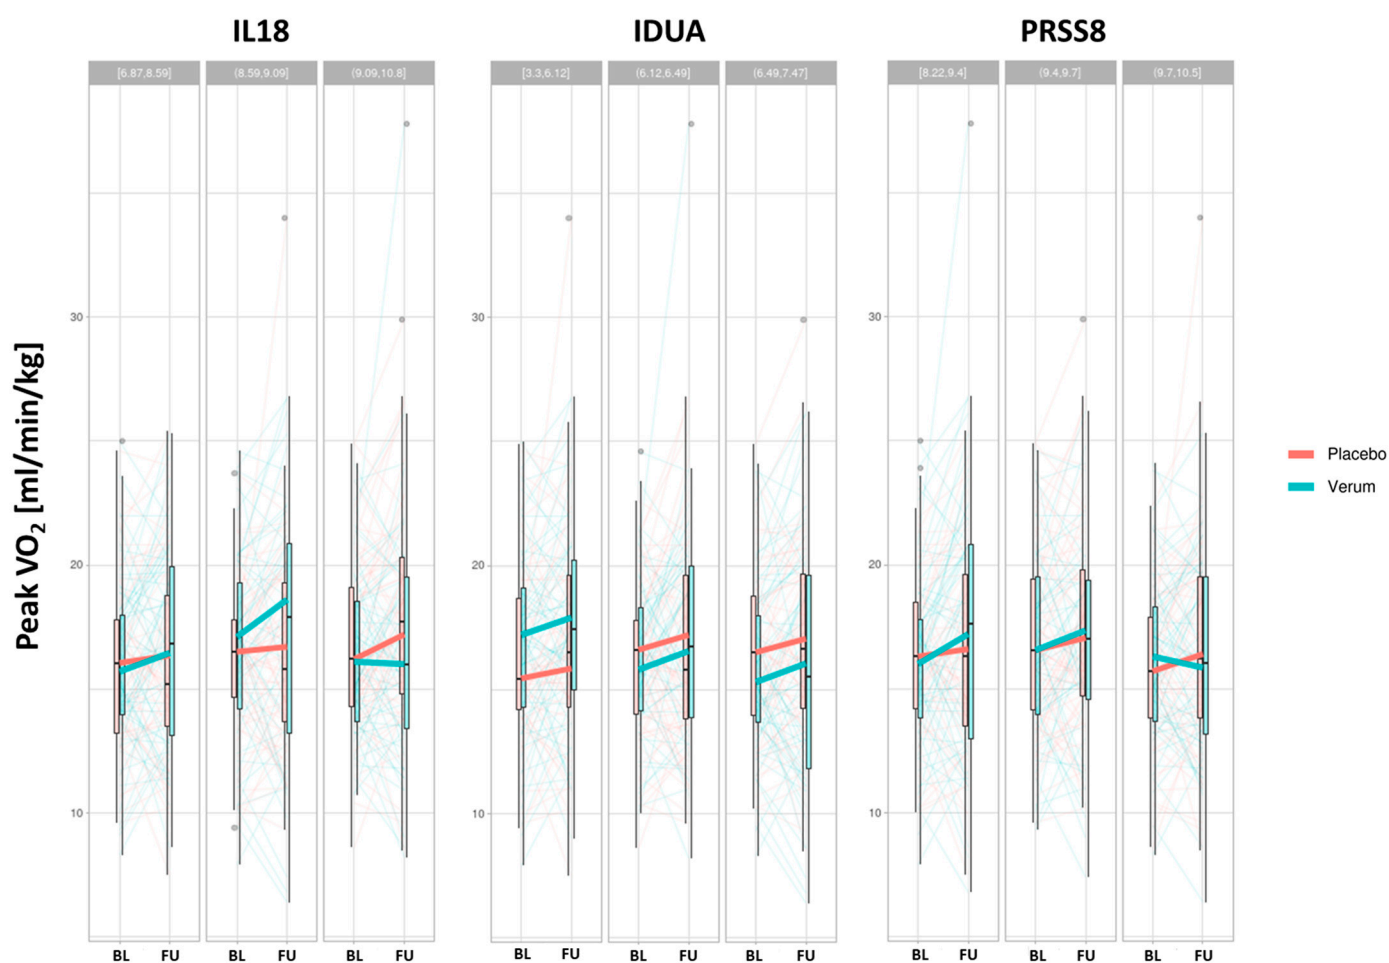

**Suppl. Figure S2: Plasma biomarkers with predictive value in regard to spironolactone-mediated effects on relative peak VO<sub>2</sub> changes in HFpEF patients.** The effect of the spironolactone treatment (verum vs placebo) on relative changes of peak VO<sub>2</sub> from baseline (BL) to twelve months follow up (FU) was assessed for interaction with BL plasma biomarker expression levels. For visualization purposes, patients were classified by BL expression level tertiles of the respective protein. Only proteins with a significant interaction are shown.
